# Supplementary material for: Baseline radiomics features and MYC rearrangement status predict progression in aggressive B-cell lymphoma
Source: PubMed Central journal article supplement — Blood Adv. 2022 Nov 2;7(2):214–23. doi: 10.1182/bloodadvances.2022008629 (PMC9841040; doi:10.1182/bloodadvances.2022008629), 2022-11-02
Supplement: BLOODA_ADV-2022-008629-mmc1.pdf [file BLOODA_ADV-2022-008629-mmc1.pdf]

**Supplemental data.**

Supplemental Table 1. Patient characteristics for all individual trials.

|                        |                   | <b>Total<br/>(n=323)</b> | <b>HOVON-130<br/>(n=54)<sup>23</sup></b> | <b>HOVON-84<br/>(n=137)<sup>24</sup></b> | <b>PETAL<br/>(n=132)<sup>25</sup></b> |
|------------------------|-------------------|--------------------------|------------------------------------------|------------------------------------------|---------------------------------------|
| Gender                 | Male              | 185 (57)                 | 41 (76)                                  | 68 (49.6)                                | 76 (58)                               |
|                        | Female            | 138 (43)                 | 13 (24)                                  | 69 (50.4)                                | 56 (42)                               |
| Age (IQR)              |                   | 63 (53-71)               | 63 (54-72)                               | 65 (55-72)                               | 62 (53-69)                            |
| Ann Arbor Stage        | 1                 | 23 (7)                   |                                          |                                          | 23 (17)                               |
|                        | 2                 | 54 (17)                  | 7 (13)                                   | 21 (15.3)                                | 26 (20)                               |
|                        | 3                 | 73 (23)                  | 6 (11)                                   | 40 (29.2)                                | 27 (21)                               |
|                        | 4                 | 173 (54)                 | 41 (76)                                  | 76 (55.5)                                | 56 (42)                               |
| LDH                    | normal            | 124 (38)                 | 14 (26)                                  | 50 (37)                                  | 60 (46)                               |
|                        | > normal          | 199 (62)                 | 40 (74)                                  | 87 (64)                                  | 72 (55)                               |
| Extranodal involvement | 0-1               | 204 (63)                 | 27 (50)                                  | 81 (59)                                  | 96 (73)                               |
|                        | >1                | 119 (37)                 | 27 (50)                                  | 56 (41)                                  | 36 (27)                               |
| WHO performance status | 0                 | 186 (58)                 | 32 (59)                                  | 86 (63)                                  | 68 (52)                               |
|                        | 1                 | 100 (31)                 | 18 (33)                                  | 36 (26)                                  | 46 (35)                               |
|                        | 2                 | 33 (10)                  | 3 (6)                                    | 15 (11)                                  | 15 (11)                               |
|                        | 3                 | 4 (1)                    | 1 (2)                                    |                                          | 3 (2)                                 |
| IPI                    | Low               | 83 (26)                  | 9 (17)                                   | 28 (20)                                  | 46 (35)                               |
|                        | Low-intermediate  | 65 (20)                  | 9 (17)                                   | 31 (23)                                  | 25 (19)                               |
|                        | High-intermediate | 104 (32)                 | 25 (46)                                  | 42 (31)                                  | 37 (28)                               |
|                        | High              | 71 (22)                  | 11 (20)                                  | 36 (26)                                  | 24 (18)                               |
| MYC                    | Negative          | 245 (76)                 |                                          | 122 (89)                                 | 123 (93)                              |
|                        | MYC-SH            | 24 (7)                   | 14 (26)                                  | 5 (4)                                    | 5 (4)                                 |
|                        | Double/triple hit | 54 (17)                  | 40 (74)                                  | 10 (7)                                   | 4 (3)                                 |
| Treatment              | 6x R-CHOP         | 99 (31)                  |                                          | 46 (34)                                  | 53 (40)                               |
|                        | 8x R-CHOP         | 29 (9)                   |                                          | 25 (18)                                  | 4 (3)                                 |
|                        | 6x R-CHOP + 2xR   | 71 (22)                  |                                          |                                          | 71 (54)                               |
|                        | 6x RR-CHOP        | 44 (14)                  |                                          | 44 (32)                                  |                                       |
|                        | 8x RR-CHOP        | 22 (7)                   |                                          | 22 (16)                                  |                                       |
|                        | Burkitt protocol  | 4 (1)                    |                                          |                                          | 4 (3)                                 |
|                        | 6x R2-CHOP + 2xR  | 54 (17)                  | 54 (100)                                 |                                          |                                       |

Abbreviations: IQR: interquartile range, LDH: lactose dehydrogenase. WHO: world health organization, IPI: international prognostic index, MYC-SH: single hit *MYC* rearrangement, R-CHOP: rituximab, cyclophosphamide, doxorubicin, vincristine, and prednisone, RR-CHOP: R-CHOP with rituximab intensification, Burkitt protocol: 2x R-CHOP followed by a burkitt protocol consisting of high-dose methotrexate, cytarabine, hyperfractionated cyclophosphamide and ifosfamide, split-dose doxorubicin and etoposide, vincristine, vindesine and dexamethasone and R2-CHOP: R-CHOP combined with lenalidomide.

Supplemental Table 2. Descriptive statistics of radiomics features stratified for *MYC* rearrangement status

|                                 | <b>MYC-wt DLBCL (n=245)</b> |               | <b>MYC-SH DLBCL (n=24)</b> |               | <b>Double/triple hit (n=54)</b> |                |
|---------------------------------|-----------------------------|---------------|----------------------------|---------------|---------------------------------|----------------|
|                                 | <i>Median (IQR)</i>         | <i>Range</i>  | <i>Median (IQR)</i>        | <i>Range</i>  | <i>Median (IQR)</i>             | <i>Range</i>   |
| SUV <sub>peak</sub>             | 17.0 (11.8 - 22.4)          | 2.5 - 48.5    | 12.0 (8.7 - 16.7)          | 3.8 - 38.1    | 17.4 (12.9 - 23.4)              | 4.8 - 42.2     |
| SUV <sub>max</sub>              | 20.6 (15.2 - 28.3)          | 4.1 - 75.1    | 14.9 (10.5 - 20.6)         | 4.3 - 44.5    | 20.6 (15.9 - 27.8)              | 5.8 - 46.8     |
| SUV <sub>mean</sub>             | 8.3 (6.5 - 10.0)            | 4.1 - 19.3    | 6.9 (5.4 - 8.2)            | 4.3 - 15.9    | 8.6 (6.8 - 10.2)                | 4.3 - 15.9     |
| TLG                             | 2288.5 (561.2 - 6207.2)     | 0.3 - 36586.4 | 2141.2 (92.5 - 8950.3)     | 1.4 - 34264.8 | 6383.3 (2004.0 - 11870.8)       | 61.1 - 47965.7 |
| MTV                             | 256.6 (54.9 - 777.0)        | 0.1 - 4746.7  | 292.5 (15.9 - 1098.7)      | 0.3 - 4467.0  | 709.5 (304.6 - 1280.1)          | 13.5 - 5598.5  |
| Number of lesions               | 7 (3 - 16)                  | 1 - 103       | 5 (1 - 15)                 | 1 - 69        | 10 (3.3 - 23.5)                 | 1 - 161        |
| Dmax <sub>bulk</sub>            | 28.2 (8.8 - 43.6)           | 0 - 74.3      | 28.6 (0 - 50.2)            | 0 - 99.5      | 35.3 (23.0 - 51.5)              | 0 - 97.1       |
| Spread <sub>bulk</sub>          | 1011.5 (138.3 - 3086.8)     | 0 - 47578.5   | 767.5 (0 - 4047.9)         | 0 - 17103.4   | 1978.0 (575.4 - 7674.8)         | 0 - 43732.3    |
| Dmax <sub>patient</sub>         | 37.3 (9.0 - 58.4)           | 0 - 86.1      | 42.3 (0 - 62.5)            | 0 - 131.2     | 50.4 (32.4 - 76.1)              | 0 - 110.3      |
| Spread <sub>patient</sub>       | 3122.0 (156.7 - 25383.9)    | 0 - 1514730   | 2099.7 (0 - 18197.4)       | 0 - 678819    | 11828.1 (1034.3 - 77878.9)      | 0 - 3263620    |
| VolumeSpread <sub>bulk</sub>    | 923.0 (18.9 - 4943.2)       | 0 - 202877    | 275.8 (0 - 10912.3)        | 0 - 227263.0  | 2623.0 (426.5 - 17188.3)        | 0 - 164012.0   |
| Volumemax <sub>patient</sub>    | 114.5 (11.0 - 497.0)        | 0 - 4651.1    | 118.2 (0 - 700.7)          | 0 - 3556.5    | 444.7 (88.3 - 752.8)            | 0 - 5397.8     |
| VolumeSpread <sub>patient</sub> | 1138.9 (23.4 - 7260.1)      | 0 - 213659    | 309.1 (0 - 10985.2)        | 0 - 251000.0  | 4586.2 (462.5 - 32641.3)        | 0 - 314464     |
| DSUV <sub>peakbulk</sub>        | 10.2 (2.0 - 15.8)           | 0 - 44.4      | 5.0 (0 - 10.3)             | 0 - 33.7      | 10.8 (5.6 - 17.5)               | 0 - 37.8       |
| DSUV <sub>peaksumbulk</sub>     | 57.8 (5.8 - 154.1)          | 0 - 1901.6    | 21.8 (0 - 84.6)            | 0 - 1042.9    | 80.3 (19.6 - 261.8)             | 0 - 1360.2     |
| DSUV <sub>peakpatient</sub>     | 10.5 (2.2 - 16.7)           | 0 - 44.4      | 5.0 (0 - 10.3)             | 0 - 33.7      | 10.8 (5.6 - 19.2)               | 0 - 37.8       |
| DSUV <sub>peaksumpatient</sub>  | 104.7 (8.7 - 483.8)         | 0 - 16300.6   | 52.6 (0 - 119.5)           | 0 - 9410.3    | 226.5 (27.5 - 1195.0)           | 0 - 15053.4    |
| DSUV <sub>peaksumhottest</sub>  | 59.2(6.8 - 167.6)           | 0 - 1974.4    | 21.8 (0 - 84.6)            | 0 - 1729.1    | 80.3 (21.1 - 261.8)             | 0 - 1360.2     |

Supplemental Table 3. H-statistics and *p* values of radiomics features per *MYC* group

|                                            | All groups  |                | <i>MYC</i> -wt vs <i>MYC</i> -SH |                | <i>MYC</i> -wt vs double/triple hit |                | <i>MYC</i> -SH vs double/triple hit |                |
|--------------------------------------------|-------------|----------------|----------------------------------|----------------|-------------------------------------|----------------|-------------------------------------|----------------|
|                                            | H-statistic | <i>p</i> value | H-statistic                      | <i>p</i> value | H-statistic                         | <i>p</i> value | H-statistic                         | <i>p</i> value |
| SUV <sub>peak</sub>                        | 5.67        | 0.06           | -                                | -              | -                                   | -              | -                                   | -              |
| SUV <sub>max</sub>                         | 6.27        | 0.04           | -2.47                            | 0.04           | 0.10                                | 0.92           | 2.21                                | 0.04           |
| SUV <sub>mean</sub>                        | 7.26        | 0.03           | -2.53                            | 0.02           | 0.59                                | 0.56           | 2.57                                | 0.02           |
| TLG                                        | 13.80       | <0.01          | -0.21                            | 0.84           | 3.65                                | <0.01          | 2.42                                | 0.02           |
| MTV                                        | 13.72       | <0.01          | 0.00                             | 1.00           | 3.67                                | <0.01          | 2.26                                | 0.04           |
| Number of lesions                          | 5.86        | 0.05           | -0.89                            | 0.37           | 2.12                                | 0.06           | 2.07                                | 0.06           |
| Dmax <sub>bulk</sub>                       | 7.17        | 0.03           | 0.07                             | 0.95           | 2.66                                | 0.02           | 1.58                                | 0.17           |
| Spread <sub>bulk</sub>                     | 7.52        | 0.02           | -0.47                            | 0.64           | 2.62                                | 0.03           | 2.02                                | 0.07           |
| Dmax <sub>patient</sub>                    | 11.55       | <0.01          | 0.10                             | 0.92           | 3.38                                | <0.01          | 1.99                                | 0.07           |
| Spread <sub>patient</sub>                  | 7.17        | 0.03           | -0.65                            | 0.52           | 2.49                                | 0.04           | 2.09                                | 0.05           |
| VolumeSpread <sub>bulk</sub>               | 11.31       | <0.01          | -0.21                            | 0.84           | 3.30                                | <0.01          | 2.20                                | 0.04           |
| Volumemax <sub>patient</sub>               | 12.02       | <0.01          | 0.07                             | 0.94           | 3.45                                | <0.01          | 2.05                                | 0.06           |
| VolumeSpread <sub>patient</sub>            | 11.52       | <0.01          | -0.31                            | 0.76           | 3.31                                | <0.01          | 2.30                                | 0.03           |
| DSUV <sub>peak</sub> <sub>bulk</sub>       | 5.79        | 0.06           | -                                | -              | -                                   | -              | -                                   | -              |
| DSUV <sub>peaksum</sub> <sub>bulk</sub>    | 6.87        | 0.03           | -1.34                            | 0.18           | 2.06                                | 0.06           | 2.43                                | 0.04           |
| DSUV <sub>peak</sub> <sub>patient</sub>    | 5.93        | 0.05           | -1.83                            | 0.10           | 1.36                                | 0.17           | 2.43                                | 0.05           |
| DSUV <sub>peaksum</sub> <sub>patient</sub> | 7.11        | 0.03           | -1.47                            | 0.14           | 2.02                                | 0.07           | 2.52                                | 0.04           |
| DSUV <sub>peaksum</sub> <sub>hottest</sub> | 6.78        | 0.03           | -1.40                            | 0.16           | 2.00                                | 0.07           | 2.45                                | 0.04           |

Supplemental Table 4. Relative feature importance of individual predictors in multivariate logistic regression models

|                             |                   | <b>IPI + MYC</b> | <b>IPI + MYC<br/>+ MTV</b> | <b>Radiomics</b> | <b>Radiomics<br/>+ MYC</b> |
|-----------------------------|-------------------|------------------|----------------------------|------------------|----------------------------|
| Estimate                    |                   | -3.355           | -3.063                     | -1.733           | -2.033                     |
| IPI                         | 2                 | 1.379            | 1.143                      |                  |                            |
|                             | 3                 | 2.018            | 1.538                      |                  |                            |
|                             | 4                 | 2.050            | 1.465                      |                  |                            |
| MYC                         | MYC-SH            | 1.261            | 1.309                      |                  | 0.895                      |
|                             | Double/triple hit | 1.344            | 1.225                      |                  | 1.209                      |
| MTV                         |                   |                  | 0.500                      | 1.003            | 0.925                      |
| Dmax <sub>bulk</sub>        |                   |                  |                            | 0.756            | 0.698                      |
| DSUVpeak <sub>patient</sub> |                   |                  |                            | -0.631           | -0.592                     |
| Spread <sub>patient</sub>   |                   |                  |                            | -0.266           | -0.309                     |

*Abbreviations: IPI: international prognostic index, MYC-SH: single hit MYC rearrangement, MTV: metabolic tumor volume*

Supplemental Table 5. Concordance and discordance between high-risk and low-risk patients as identified by the IPI risk score, MYC rearrangement status and the radiomics+MYC prediction model.

|              | IPI high | IPI low | MYC high | MYC low | Rad+myc high | Rad+myc low |
|--------------|----------|---------|----------|---------|--------------|-------------|
| IPI high     | 71       | 0       | 16       | 55      | 25           | 46          |
| IPI low      | 0        | 252     | 38       | 214     | 41           | 211         |
| MYC high     | 16       | 38      | 54       | 0       | 35           | 19          |
| MYC low      | 214      | 55      | 0        | 269     | 31           | 238         |
| Rad+myc High | 25       | 41      | 35       | 31      | 66           | 0           |
| Rad+myc low  | 46       | 211     | 19       | 238     | 0            | 257         |

*Abbreviations: IPI: international prognostic index, Rad+myc: radiomics+MYC prediction model.*

Supplemental Table 6. Survival rates of high risk and low risk patients according to prediction models using 2-year progression free survival (PFS) and 2-year overall survival (OS) as outcome parameter

|                 |                   | PFS (95% CI)     | OS (95% CI)      |
|-----------------|-------------------|------------------|------------------|
| IPI             | low               | 92.9 (87.7-98.5) | 94.1 (89.2-99.3) |
|                 | low-intermediate  | 80.6 (71.7-90.6) | 89.6 (82.5-97.2) |
|                 | high-intermediate | 69.8 (61.6-79.1) | 83.0 (76.1-90.5) |
|                 | high              | 64.9 (55.1-76.5) | 68.8 (59.2-80.0) |
| MYC             | MYC-wt            | 81.7 (77.1-86.6) | 87.9 (84.0-92.0) |
|                 | MYC-SH            | 66.7 (50.2-88.5) | 82.9 (69.0-99.7) |
|                 | Double/triple hit | 57.4 (45.6-72.2) | 64.8 (53.3-78.9) |
| IPI MYC         | low               | 83.5 (78.9-88.4) | 89.8 (86.1-93.8) |
|                 | high              | 60.6 (51.7-71.0) | 69.6 (61.1-79.3) |
| IPI MYC MTV     | low               | 82.9 (78.4-87.6) | 88.6 (85.0-92.4) |
|                 | high              | 56.4 (46.4-68.6) | 59.3 (47.5-73.9) |
| Radiomics       | low               | 84.0 (79.7-88.6) | 87.9 (84.1-91.8) |
|                 | high              | 52.6 (42.6-64.9) | 63.0 (51.3-77.3) |
| Radiomics + MYC | low               | 84.8 (80.5-89.3) | 89.0 (85.4-92.7) |
|                 | high              | 50.6 (40.7-63.0) | 57.4 (45.6-72.2) |

Abbreviations: CI: confidence interval, IPI: international prognostic index, MYC-wt: MYC wild type, MYC-SH: single hit MYC rearrangement, MTV: metabolic tumor volume.

Supplemental Figure 1. Kaplan-Meier survival curves of high-risk and low-risk groups for 2-year overall survival

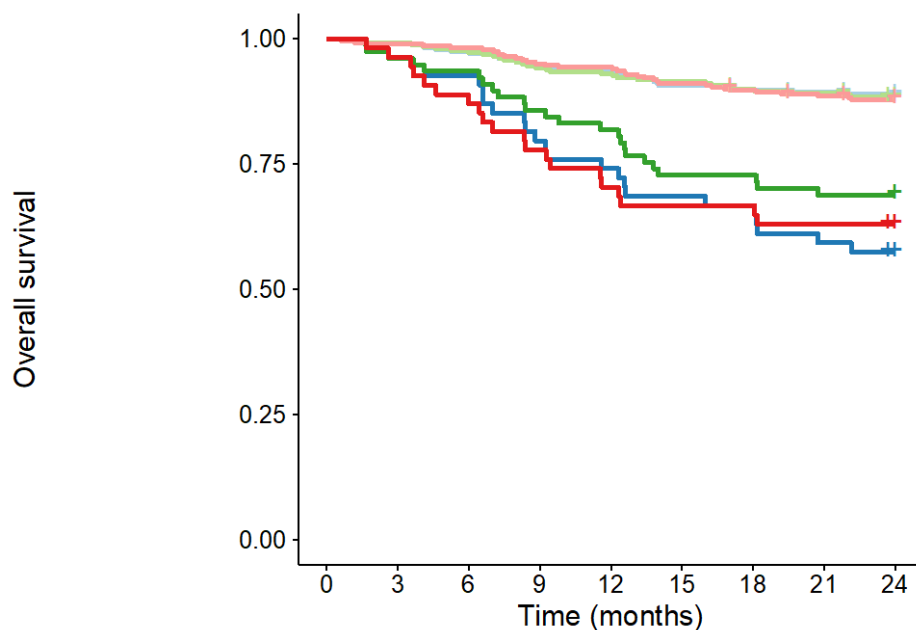

Number at risk

|                    |     |     |     |     |     |     |     |     |     |
|--------------------|-----|-----|-----|-----|-----|-----|-----|-----|-----|
| low Radiomics+MYC  | 281 | 278 | 273 | 266 | 263 | 255 | 251 | 249 | 247 |
| high Radiomics+MYC | 54  | 52  | 50  | 43  | 40  | 37  | 36  | 32  | 30  |
| low IPI            | 258 | 256 | 251 | 243 | 240 | 236 | 231 | 228 | 224 |
| high IPI           | 77  | 74  | 72  | 66  | 63  | 56  | 56  | 53  | 53  |
| low Radiomics      | 281 | 278 | 276 | 267 | 265 | 256 | 251 | 247 | 244 |
| high Radiomics     | 54  | 52  | 47  | 42  | 38  | 36  | 36  | 34  | 33  |
